# Supplementary material for: Potato-Resistant Starch Supplementation Improves Microbiota Dysbiosis, Inflammation, and Gut–Brain Signaling in High Fat-Fed Rats
Source: PubMed Central journal article supplement (PMC6893629; doi:10.3390/nu11112710), 2019-11-08
Supplement: nutrients-11-02710-s001.pdf [file nutrients-11-02710-s001.pdf]

Online Supporting Material

1 **Supplemental Table S1.** Diet composition of HF and HFRS diets<sup>1</sup>

| Diet ingredient (g)                   | HF            | HFRS          |
|---------------------------------------|---------------|---------------|
| Casein                                | 200           | 200           |
| L-Cystine                             | 3             | 3             |
| Corn Starch                           | 72.8          | 0             |
| Maltodextrin 10                       | 100           | 26            |
| Raw Potato Starch <sup>2</sup>        | 0             | 172.8         |
| Sucrose                               | 172.8         | 172.8         |
| Cellulose                             | 50            | 50            |
| Soybean Oil                           | 25            | 25            |
| Lard                                  | 177.5         | 177.5         |
| Mineral Mix S10026                    | 10            | 10            |
| Dicalcium Phosphate                   | 13            | 13            |
| Calcium Carbonate                     | 5.5           | 5.5           |
| Potassium Citrate, 1 H <sub>2</sub> O | 16.5          | 16.5          |
| Vitamin Mix V100001                   | 10            | 10            |
| Choline Bitartrate                    | 2             | 2             |
| FD&C Yellow Dye #5                    | 0             | 0             |
| FD&C Red Dye #40                      | 0.05          | 0             |
| FD&C Blue Dye #1                      | 0             | 0.05          |
| <b>Total</b>                          | <b>858.15</b> | <b>884.15</b> |

2 <sup>1</sup>Diets prepared by Research Diets, Inc. HF=high fat diet, HFRS=high fat resistant starch. <sup>2</sup> Potato starch was 60%  
3 resistant starch.

Online Supporting Material

**Supplemental Table S2.** Resistant starch in raw potato starch, Chow, HF, and HFRS diets

|          | Potato Starch | Chow | HF  | HFRS |
|----------|---------------|------|-----|------|
| % RS (g) | 60            | 1.4  | 0.1 | 11.9 |

<sup>1</sup> HF, high fat; HFRS, high fat resistant starch; RS, resistant starch.

Online Supporting Material

Supplemental Figure S1. Microbiota Abundance by Taxonomic Level<sup>1</sup>.

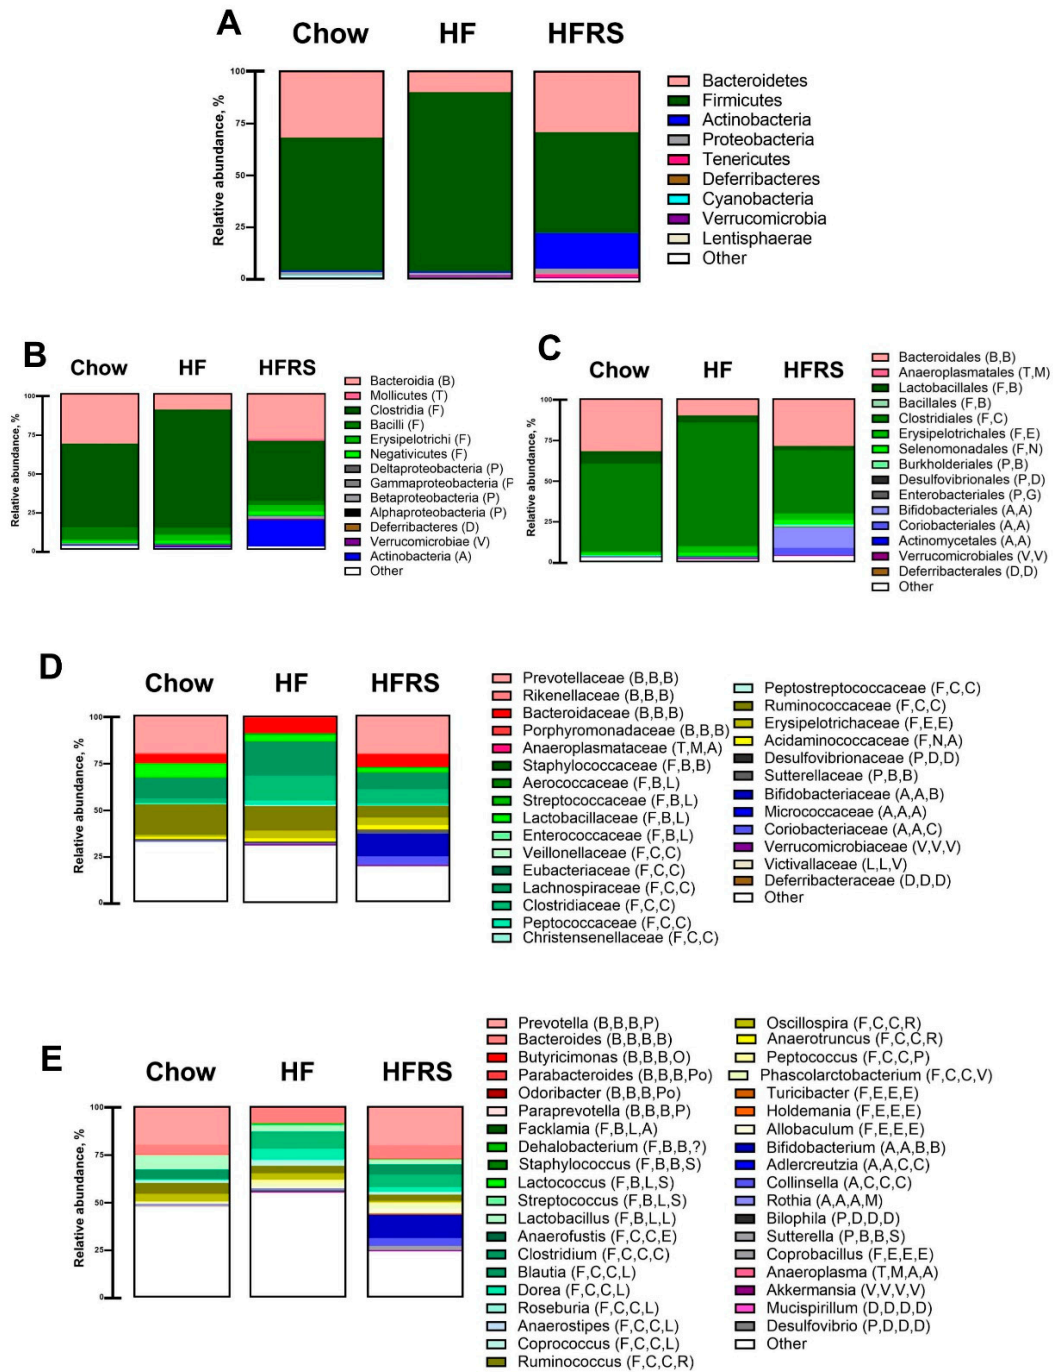

<sup>1</sup>Microbiota abundances for Chow, HF, and HFRS. **Phyla:** B: *Bacteroidetes*, F: *Firmicutes*, T: *Tenericutes*, P: *Proteobacteria*, A: *Actinobacteria*, V: *Verrucomicrobia* **Class:** B: *Bacilli*, B: *Bacteroidia*, C: *Clostridia*, E: *Erysipelotrichia*, M: *Mollicutes*, N: *Negativicutes*, D: *Deferribacteres*, A: *Actinobacteria*, V: *Verrucomicrobiae*, B: *Betaproteobacteria*. **Order:** B: *Bacteroidales*, C: *Clostridiales*, L: *Lactobacillales*, E: *Erysipelotrichales*, B: *Burkholderiales*, B: *Bifidobacteriales*. **Family:** C: *Clostridiaceae*, L: *Lachnospiraceae*, R: *Ruminococcaceae*, L: *Lactobacillaceae*, E: *Erysipelotrichaceae*, D: *Desulfovibrionaceae*, B: *Bifidobacteriaceae*, V: *Verrucomicrobiaceae*, A: *Acidaminococcaceae*. Phyla level (A), Class (B), Order (C), Family (D), and Genera (E). HF=high fat, HFRS=high fat resistant starch, n=8.
